# 1 Life-history traits inform on population trends when assessing the 2 conservation status of a declining tiger shark population

3 Christopher J. Brown <sup>1</sup>

4 George Roff <sup>2</sup>

5 1. Australian Rivers Institute, Griffith University, 170 Kessels Road, Nathan, Queensland,  
6 4111, Australia

7 2. School of Biological Sciences, University of Queensland, QLD 4072, Australia.

8

## 9 Abstract

10 1. The assessment of the conservation status of wide ranging species depends on  
11 estimates of the magnitude of their population trends. The accuracy of global trend  
12 estimates will depend on how many locations within a species range are sampled and  
13 where in the range population size is sampled.

14 2. We ask how the spatial extent of sampling within a species range interacts with non-  
15 linear patterns in long-term trends to affect estimates of decline in standardised catch  
16 of tiger sharks (*Galeocerdo cuvier*) in a shark control program on the east coast of  
17 Australia. We use Bayesian random effects models to estimate long-term population  
18 trends. We compare estimates of trends where we use all data spanning 11.5 degrees  
19 of latitude to estimates that used spatial subsets of the data. We also introduce a

20 method to that uses prior information on species life-history to inform on the expected  
21 level of population variation.

22 3. As more regions were included in the model the trend estimates converged towards  
23 an overall decline of 64% over three generations. Trends estimated from data only  
24 from northern regions underestimated the regional decline, trends estimated from  
25 data only from southern regions overestimated the regional decline. When a subset of  
26 regions were modelled, rather than the full data-set, the estimated trend depended on  
27 the choice of the Bayesian prior for population variation. The prior informed by life-  
28 history traits performed well, a prior incorrectly informed by life-history traits of a  
29 much slower growing shark species performed poorly.

30 *Synthesis and applications* The rate of decline in tiger sharks is consistent with a listing East  
31 Coast Australia tiger sharks as endangered under local legislation. Monitoring programs  
32 that aim to estimate population trends should attempt to cover the extremes and mid-  
33 points of a population's range. Life-history information can be used to inform priors for  
34 population variation and may give more accurate estimates of trends that can be justified  
35 in debates about red listing of threatened species, particularly when sampling is limited.

36 **Keywords: Bayesian model, informed prior, migratory species, IUCN red list, megafauna**

## 37 **Introduction**

38 Determining the status of species threatened by human activities is important for  
39 informing the investment of conservation funds (Rodrigues et al. 2006). A species' status is  
40 often defined on the basis of trends in population size (Conservation of Nature Species

41 Survival Commission 2001). For instance, some Great Hammerhead Shark populations  
42 (*Sphyrna mokarran*) were listed as critically endangered on the International Union for the  
43 Conservation of Nature (IUCN) Red List, partly on the basis of an >80% population decline  
44 over the past three generations (Camhi et al. 2009). The performance of management  
45 actions aimed at averting decline should also be assessed by monitoring population trends  
46 (e.g. Ward-Paige et al. 2012). Monitoring data will be most useful when it covers sufficient  
47 spatial and temporal scales to estimate trends accurately.

48 Accurate estimates of the magnitude of a population change may be confounded by short-  
49 term and localised variation in abundance, or masked by measurement errors (Gaston &  
50 McArdle 1994). Migration into and out of the sampling area may also bias local abundance  
51 measurements of mobile species (Forney 2000). Our ability to observe a species may also  
52 vary place to place because of environmental variation, for instance, catch indicators of  
53 tiger shark (*Galeocerdo cuvier*) abundance vary inter-annually with temperature (Payne et  
54 al. 2018). This issue is likely to be worsened where sampling of abundances is limited to  
55 few locations within a species' broader range, because fewer sites are more likely to exhibit  
56 random variations that do not reflect the population's true trend (Forney 2000). The  
57 precision of population trend estimates will therefore depend on the spatial extent of  
58 sampling.

59 Appropriately formulated statistical models can separate short-term noise from important  
60 trends. Linear and log-linear models have been popular approaches trend analysis (e.g.  
61 Dudley & Simpfendorfer 2006; Baum & Blanchard 2010; Keith et al. 2015; Knappe 2016).  
62 Linear models provide a simple phenomenological model of trends, but may miss non-linear

63 changes and be influenced by short-term temporal ‘outliers’ (Fewster et al. 2000; Knapé  
64 2016). Non-linear statistical models, like smoothing splines, are another popular  
65 phenomological approach, because they smooth over short-term deviations in abundance  
66 to capture longer-term non-linear trends (Fewster et al. 2000; Forney 2000; Knapé 2016).  
67 A choice must then be made in the modelling about the degree of smoothing. This choice is  
68 usually made based on sample size (Fewster et al. 2000) or the level of smoothing is fitted  
69 empirically with a method like generalized cross validation (Wood 2006). However,  
70 empirical approaches to smoothing can lead to over-fitting and biased inferences on trends  
71 (Knapé 2016).

72 A model’s fit to time-series data can also be controlled by using process models that  
73 explicitly account for species life-history traits (Kindsvater et al. 2018; Sköld & Knapé  
74 2018). Process models can be effective at discerning short-term noise from longer term  
75 trends driven by population dynamics (e.g. Wilson et al. 2011; Rueda-Cediel et al. 2018),  
76 but accurate estimation of population parameters can be difficult if the population trend  
77 exhibits a ‘one-way-trip’ (Szuwalski & Thorson 2017). ‘One-way-trips’ will be common in  
78 species data that is being analysed for extinction risk. Process models, such as those used to  
79 model trends in fished populations also make additional assumptions that can lead to  
80 biased reporting of trends (Edgar et al. 2018). What we need is an approach that takes  
81 strength from both the phenomological and process based approaches to obtain accurate  
82 estimates of population trends in the face of monitoring data that is limited in geographic  
83 and temporal extent.

84 Here we apply Bayesian random-effects models to fit trends to population declines. We use  
85 a species' life-history traits as Bayesian prior information to control the level of smoothing  
86 in the fitted trend line. Inclusion of life-history information can improve the estimation of  
87 population trends, and may be particularly beneficial for overcoming the deficiency of  
88 monitoring data for many potentially threatened species (Kindsvater et al. 2018). The  
89 approach is thus a hybrid that blends phenomological description of trends with ecological  
90 processes that inform the smoothing. We use simulations to explore the accuracy of fitted  
91 trends for species with a range of population growth rates.

92 As a case-study we modelled multi-decadal trends in a declining tiger shark population  
93 from the east coast of Australia (Holmes et al. 2012; Roff et al. 2018). The data are from the  
94 Queensland Shark Control Program (QSCP) a unique spatially replicated annual time-series  
95 of shark catch and effort that covers 1962-2017. We aimed to determine (A) how the choice  
96 of prior influences the models' ability to detect a long-term trend in relative abundance;  
97 and (B) whether the appropriate choice of a prior can give a more accurate estimate of the  
98 large-scale trend when sampling is constrained to fewer regions.

## 99 **Methods**

### 100 **Case-study**

101 We analysed temporal variation in shark catch per unit effort in the Queensland Shark  
102 Control Program (QSCP, Kidston et al. 1992). The QSCP was instigated in 1962 at several  
103 sites around south-east Queensland, and has since been expanded to 11 regions across  
104 1760km of coastline, ranging from the tropics (16.7°S) to sub-tropical areas (28.2°S, Figure

105 1). The QSCP uses a series of baited drumlines and mesh nets to capture sharks. The nets  
106 and drumlines are checked by contractors 15-20 days of each month, who also record the  
107 length and taxonomic identity of captured sharks. A previous analysis of this same data-set  
108 found declines in four major groups of sharks caught in the QSCP, and declines were  
109 consistent across regions, suggesting a common trend across the eastern coast of Australia  
110 in these shark groups (Roff et al. 2018). This included a 75% decline in tiger sharks  
111 between 1962 and 2017 (Roff et al. 2018). Effort data in the form of total number of nets  
112 and drumlines was reconstructed using historical records from contractor's logbooks  
113 between 1962-2017. Historical effort records account for seasonal lifting of gear and  
114 swapping of gear between beaches during seasons to avoid bycatch of turtles and whales,  
115 and annual effort was adjusted to reflect these changes (Roff et al. 2018). Where catch  
116 records were unclear or uncertainty existed regarding number of drumlines or nets,  
117 beaches were excluded from the analysis (Roff et al. 2018). Since the early 1990's,  
118 drumlines and net types have been standardised across the program (Sumpton et al. 2010).

119 A recent analysis of the QSCP data found declines in four major groups of sharks across  
120 regions, suggesting a common trend across the eastern coast of Australia in these shark  
121 groups (Roff et al. 2018). Here, we explore the impact of model choice and the spatial  
122 extent of data on estimates of tiger shark declines. We focus on tiger sharks because: (1)  
123 they are reliably identified due to their distinctive body stripes (Fig 1b) (Holmes et al.  
124 2012; Roff et al. 2018); (2) there are extensive catch records for this species, providing  
125 sufficient data for us to analyse the effect of using data from a sub-set of regions; (3) they  
126 may be of conservation concern because the previous found declines of ~75% between

127 1962 and 2017 (Roff et al. 2018) and (4) the declines were non-linear, making tiger sharks  
128 a useful test-case for exploring the impact of non-linear trends on estimates of decline.  
129 For inclusion in the IUCN red list, populations must exhibit observed, estimated, inferred or  
130 suspected population size reductions over the last 10 years, or over three generations  
131 (Conservation of Nature Species Survival Commission 2001). Many regional agencies also  
132 apply the IUCN red listing criteria to determine local listing of species, including the state of  
133 Queensland and Australia (Committee 2019; Environment & Heritage Protection 2019).  
134 Analysis of sharks caught in the QSCP indicate an estimated age at 50% of maturity (A50)  
135 for female sharks of 10-13 years (Holmes et al. 2015). Based on this criteria, we analysed  
136 the QSCP dataset of 11 regions for trends in tiger shark catches between two time periods:  
137 three generations which was 1984 to 2017; and the longer term trend over 1970 to 2017.  
138 1970 was the earliest year shared by all sites used in the regional subsets.

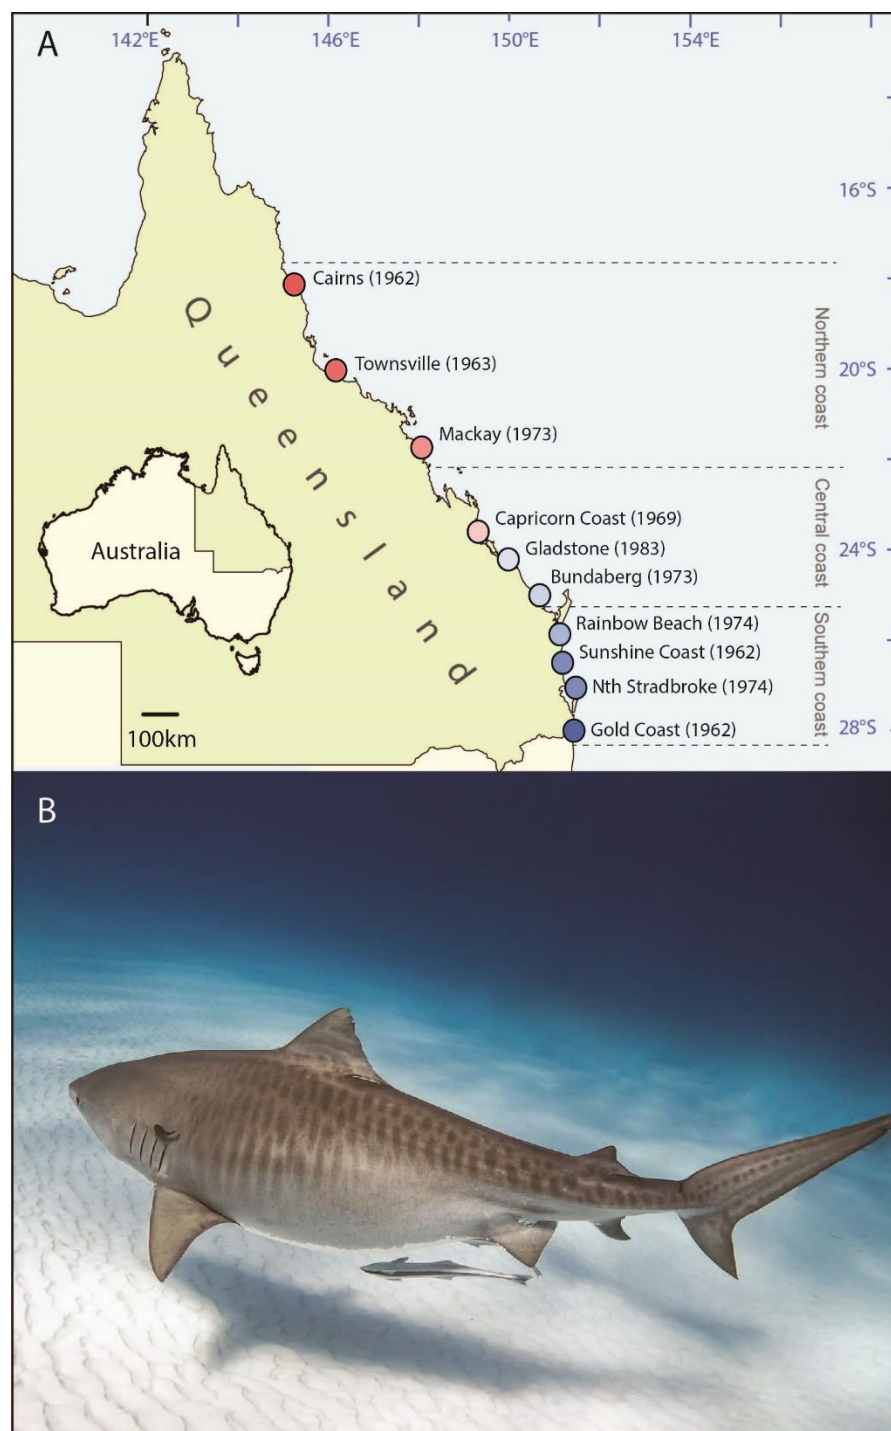

139

140 **Figure 1** A) Map of the study region, showing major regions, first year of shark program  
141 sizes and scaling of sites from north to south, B) mature female *Galeocerdo cuvier* (~3m  
142 length) showing characteristic vertical striping pattern. Photo credit: Juan Oliphant



## 143 Model

144 We used Bayesian random effects models to fit non-linear trend lines to tiger shark CPUE  
145 patterns. The model of the count of shark catch for each region, gear type and year ( $y_{i,g,t}$ )  
146 was as follows:

$$147 \quad y_{i,g,t} \sim nbinom(\mu_{i,g,t}, \theta)$$

148 Where  $\theta$  was the scale parameter of the negative binomial distribution and  $\mu_{i,g,t}$  was the  
149 expected abundance. The expectation was specified:

$$150 \quad \ln(\mu_{i,g,t}) = \alpha + \beta x_{i,g,t} + b_i + z_t + E_{i,g,t}$$

151 Where  $\alpha$  was a global intercept,  $\beta$  was the additive effect of mesh nets,  $x_{i,g,t}$  was an  
152 indicator variable for nets (=1) or drumlines (=0),  $b_i$  was an independent, normally  
153 distributed random effect of region, with standard deviation  $\sigma_{b_i}$ . Gear and region  
154 effects were included to help control for differences in catches in different location by  
155 different gear types (e.g. Holmes et al. 2012).  $z_t$  was a latent first order random walk, with  
156 standard deviation  $\sigma_{RW1}$  (e.g. Rue & Held 2005):

$$157 \quad z_{t+1} - z_t \sim norm(0, \sigma_{RW1})$$

158 The random walk allows for non-linear trends in abundance with time, but will shrink  
159 toward a flat line for small values of  $\sigma_{RW1}$ . The term  $E_{i,g,t}$  was an offset term that accounted  
160 for variation in the number of drum lines and nets across time and regions. This model is  
161 similar to that used in Roff et al. (2018), except that we ignored site level variation by  
162 summing over drum/net sites within a region.

163 We specified prior distributions for the parameters  $\alpha$ ,  $\beta$  and the hyper-parameters  $\theta$ ,  
164  $\sigma_b$  and  $\sigma_{RW1}$ . For  $\alpha$  and  $\beta$  we used broad normal priors with mean zero. These are the  
165 defaults in the software we used (Martins et al. 2013). For  $\sigma_b$  we also used the default that  
166 is a weakly informative loggamma prior with parameters 1 and 1e-5. For  $\theta$  we used the  
167 penalized complexity prior with one parameter. We set this parameter to a value of 7 based  
168 on a simulation study (Supplementary material). The penalized complexity prior will  
169 shrink the negative binomial distribution toward a Poisson distribution if there is not  
170 strong evidence for over-dispersion ( $\sigma^2 \gg \mu$ ) (Simpson et al. 2017). Using weakly  
171 informative priors means computations are more efficient and avoids overfitting the data  
172 to the variance parameters (Simpson et al. 2017). Finally, we refitted models with several  
173 different priors for  $\sigma_{RW1}$ , as is explained below. To perform Bayesian computation we used  
174 the programming package INLA (Integrated Nested Laplace Approximation) (Rue et al.  
175 2009, 2017) as implemented in the R programming environment (INLA version 17.06.20; R  
176 version 3.4.4; Martins et al. 2013; R Core Team 2018).

### 177 **Prior choice for the standard deviation of the random walk**

178 The prior for the standard deviation of the random walk controls the level of smoothing in  
179 the trend line. A prior that has greater density closer to a smaller standard deviation will  
180 shrink the trend toward a constant line. We used life-history information on the annual  
181 potential for variation in tiger shark abundance to inform the prior for the random walk  
182 (Simpson et al. 2017). The standard deviation of a random walk has a direct interpretation  
183 in terms of population growth: For the exponential population model  $N_t = N_{t-1}e^{r_t}$ , where  
184  $r_t$  is an annually varying instantaneous growth rate and is sampled from a normal

185 distribution, the standard deviation of a (logged) random walk will equal the standard  
186 deviation of  $r$  ( $\sigma_{RW1} = \sigma_r$ ). In applying this approach to CPUE data, we assumed that CPUE  
187 was proportional to population abundance.

188 One potential pitfall of the above approach is that normally distributed values of  $r_t$  imply  
189 the same probability of increases as decreases, thus, a prior constrained by population  
190 growth may also limit our ability to observe large population declines. To overcome this  
191 problem we used a penalized complexity prior for precision of the variance of the random  
192 walk (Simpson et al. 2017). The penalized complexity prior had a high density near a  
193 standard deviation of zero, but also a long tail (Figure 2). The long tail accommodates the  
194 possibility of rapid declines provided they result in sustained changes to CPUE. For  
195 instance, a sudden decline in CPUE would be smoothed over if the population immediately  
196 recovered the next year, which might be indicative of a temporary migration. Whereas, we  
197 would expect a sudden decline that was caused by overfishing to result in a sustained  
198 decline in CPUE, such sustained changes would be captured by the model, but we explore  
199 this assumption below.

200 Given that tiger sharks are large predators with relatively late age at maturity (estimated at  
201 10-13 years by Holmes et al. (2015)), a low fecundity and a high adult survival rate (Cortés  
202 2002), we assumed that the instantaneous growth rate represents the near maximum rate  
203 of negative or positive annual change in the population. Therefore, we choose the penalized  
204 complexity prior such that there was only a 0.025 probability of a standard deviation  
205 greater than a prior estimate of  $r$  for tiger sharks. The exact probability level of 0.025 is  
206 arbitrary, but the probability should be small enough that annual changes larger than  $r$  are

207 unlikely. The penalized complexity prior combined with the normally distributed random  
208 walk meant the probability of  $r_t > r_{max}$  (or  $r_t < -r_{max}$ ) was 0.016.

209 We obtained an estimate of the maximum annual instantaneous growth rate by applying  
210 the corrected Lotka-Euler equation to *G. cuvier* life-history parameters (Cortés 2016; Pardo  
211 et al. 2016). We used life-history parameters from the local region where possible  
212 (Supplementary information). The estimate of the instantaneous rate of increase for Pacific  
213 tiger sharks was 0.24, which is consistent with previous estimates from the Atlantic (Cortés  
214 2016; Pardo et al. 2016).

215 We compare results from the best-guess prior with three other priors. The first was the  
216 INLA default prior (a loggamma with parameters (1, 1E-5)). The second and third were  
217 penalized complexity priors parameterised to represent a very slow growing shark species  
218 ( $U = \log(1.01)$ ) and a very fast growing shark species ( $U = \log(1.66)$ ) (Cortés 2002). We  
219 also tried ‘traditional’ broad gamma priors (e.g. the gamma(0.01, 0.01) prior) however we  
220 found that they caused significant issues with model estimation. Such priors are now  
221 eschewed by statisticians, because they allow for unrealistically high variance (e.g. Simpson  
222 et al. 2017).

223 In the INLA implementation we set the ‘scale.model’ option equals ‘FALSE’ to ensure the  
224 value provided for  $\sigma_{RW1}$  was interpreted as the marginal standard deviation. We also set  
225 ‘constr’ equals ‘FALSE’ to remove the sum to zero constraint.

226

## 1. Obtain life history parameters for the species

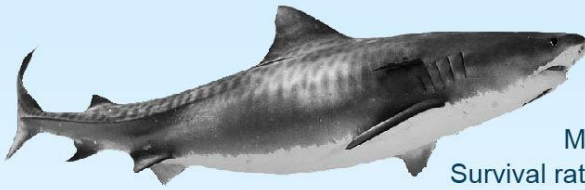

Tiger shark

*Galeocerdo cuvier*

Maximum age = 28 years

Survival rate of adults = 0.93

Reproductive cycle biennial or triennial.

Annual number of female offspring per mother = 30 - 70

## 2. Estimate maximum population growth rate

$$1 = \sum_X^W l_X m_X e^{-rX}$$

Euler's equation for  $r = 0.24$

## 3. Specify informed prior for long-term population variation

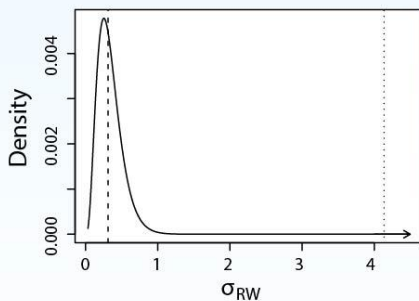

We used a penalized complexity prior (Simpson *et al.* 2017), which defines

$$\text{pr}(\sigma_{RW} > U) = \alpha$$

Where  $\alpha$  is a probability level (= 0.025)

$U$  is a quantile

$\sigma_{RW}$  is the standard deviation of the random walk

## 4. Model population data with a random walk to estimate the trend

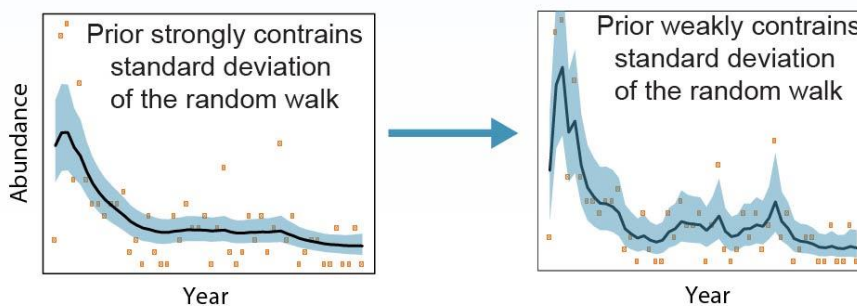

227

228 **Figure 2** The approach for using life-history information to inform on trends in population

229 modelling. From Cortes 2002

## 230 **Analyses**

231 We initially ran a simulation study to explore the impact of prior choice on estimation for  
232 species with a range of life-history traits. We simulated random walks and then fit models  
233 to the simulated data. We simulated drifting random walks (with an average decline of  
234 2.5% per year) that covered the range of shark species population growth rates with  
235 simulations for values of  $exp(\sigma_r) = 1.01, 1.34$  and  $1.66$  (Cortés 2002). For each trend and  
236 life-history type we simulated 20 replicate time-series of 30 years. Annual observations  
237 were then sampled from a negative binomial distribution with an expectation equal to the  
238 random walk value in each year and a dispersion (size) parameter = 2, to generate  
239 overdispersed counts. We repeated these analyses drawing observation errors from a  
240 Poisson distribution. We assumed effort was fixed over time and initial CPUE was set at 10  
241 (approx. mean for tiger sharks). For each time-series we fitted three negative binomial  
242 models with different penalized complexity priors:  $\sigma_{rw} = \ln(1.01), \ln(1.34)$  and  $\ln(1.66)$ . In  
243 total we simulated 120 random time-series, fitting a total of 360 models. Each set of model  
244 fits was evaluated by: (1) the product of the likelihood of the true (simulated) mean given  
245 the fitted marginal probability distributions in each year and; (2) using the predictive  
246 ordinate (Held et al. 2010).

247 We also studied the ability of different priors and models to detect sudden sustained  
248 population crashes. In these simulations we used the same priors and observation errors as  
249 above and an initial CPUE of 50. We created time-series where the mean abundance was  
250 stable for 27 years, then collapsed in the 28th year to one of four values (12.5%, 25% or

251 50%). Models were fitted with random walks and either three or six years of post-decline  
252 observations (see Supplementary material).

253 For the tiger shark data we explore the impact of the extent of sampling and prior choice on  
254 estimates of decline over the time periods 1970 to 2017 and 1984 to 2017. We fit models to  
255 60 subsamples of time-series drawn from different subsets of all regions and different  
256 prior specifications. We performed a factorial set of analyses crossing the four prior  
257 densities for  $\sigma_{RW1}$  with subsets of the number of regions included in the model fitting. We  
258 included 15 subsets of the set of 11 regions. The 15 subsets were a factorial cross of 1, 3, 6  
259 and 9 regions crossed with a selection of regions grouped into: (A) the northern-most  
260 regions, (B) middle latitude regions, (C) southern-most regions and, (D) regions equally  
261 dispersed across the full extent of the dataset (fig. 1). For the subsets, we chose regions that  
262 had the most complete time-series. We also ran all priors for the complete set of 11 regions.

263 We compared results from all tiger shark model fits for their predictions of the magnitude  
264 of the population decline across two time-periods. Comparisons were made to the 11  
265 region model with the life-history prior as our best-estimate. The % magnitude of  
266 population decline from the reference year was calculated as  $-100(1 - z_{2017}/z_0)$  where  
267  $z_{2017}$  was the value of the smoother in the most recent year and  $z_0$  was its value at the  
268 reference year (1970 or 1984). We used INLA's 'lincomb' feature to calculate the marginal  
269 posterior distribution of the % decline statistic. We then compared scenarios for their  
270 median values and 95% credible intervals.

271 We also compared results for the tiger sharks by fitting a Generalized Additive Mixed  
272 Model (GAMM) with maximum likelihood methods and cross validation (with the R



273 package mgcv, version 1.8-23 Wood 2017). The GAMM was fit with random effects by  
274 regions (for sub-samples with >1 region) and a thin plate smoothing spline applied to year.  
275 The maximum degrees of freedom was set to either 1/3 the number of years (Fewster et al.  
276 2000), or chosen with cross-validation (Wood 2017).

## 277 **Results**

278 The simulation study indicated that model fits were a more accurate representation of the  
279 true mean for slower growing species when compared to fast-growing species (Fig 3). Slow  
280 growing species had less variability overall, so it was easier to detect the simulated trend.  
281 For all species, fits were more accurate with either medium or fast priors, when compared  
282 to the slow prior (Fig. 3). Interestingly, the predictive ordinate, a standard in-sample  
283 evaluation measure did not detect any differences in the accuracy of fits by different priors  
284 (Fig S2). In general, fits to the model with Poisson errors, rather than over-dispersed  
285 negative binomial errors, were slightly more accurate (Fig 3, S2).

286 The simulation study of a sudden rapid decline showed that the faster priors were more  
287 likely to detect a sudden decline in CPUE (Fig S3). With the slow prior, the model estimated  
288 probability of a decline was always near 0.5. The models fitted to observations that were  
289 negatively binomially distributed were less sensitive to the decline than if the data were  
290 Poisson distributed. For instance, the probability of detecting a sudden decline with  
291 medium or fast priors was near one when data were Poisson distributed for any magnitude  
292 of decline and length of post-decline data. When data were negative binomially distributed  
293 the probability of decline was estimated to be between 0.55 and 0.88 for three years of  
294 post-decline data and between 0.6 and 0.9 for six years of post-decline data (Fig S3).



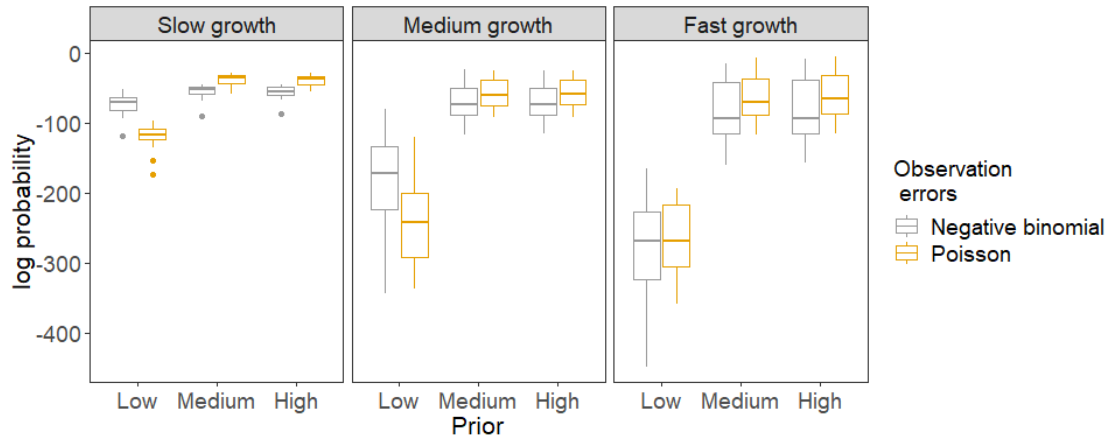

295

296 **Figure 3** Results from simulation study for the log probability of the true simulated mean

297 across all sample years given the results of the fitted model. Horizontal axes give the

298 different priors, the panels show results from models fitted to time-series data simulated

299 for species with different life-history traits. Higher (less negative values) indicate the

300 model performed better at recovering the true trend. Boxes give the inter-quartile range

301 and the horizontal bar gives the mean value. Vertical error bars extend no more than

302 1.5xIQR.

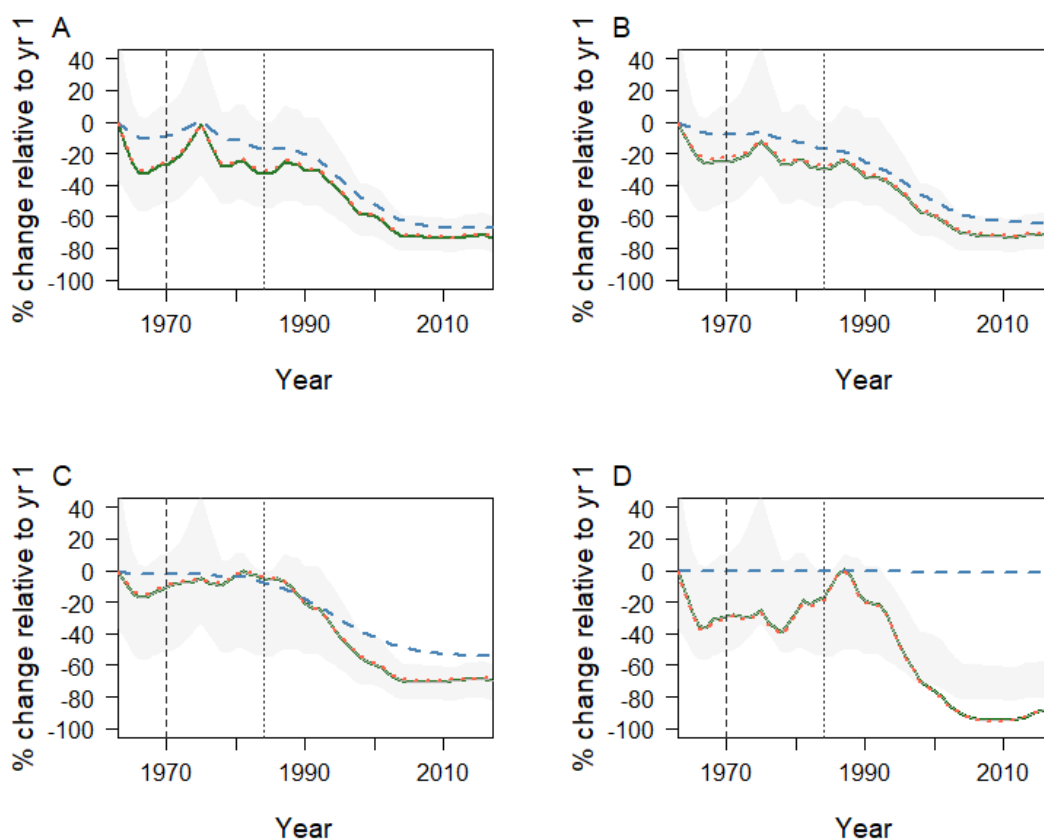

303

304 **Fig 4** Examples of non-linear trends fitted to the tiger shark data. Models fitted to all  
305 regions (A), and 6 and 3 extreme-latitude regions (B, C), and just the southern-most region  
306 (Gold Coast) (D). Lines show the fitted values for the random walk with 95% C.I.s (shading)  
307 for the life-history prior (solid), slow life history prior (dashed) and INLA default prior  
308 (dotted, orange). For comparison the 95% C.I.s for model fitted to all data with the life-  
309 history prior is included as the shaded polygon.

310 For tiger sharks the magnitude of decline over three generations was reasonably accurate  
311 with any prior and data from six or more regions (Fig 4, Fig 5). The slow prior tended to  
312 under-estimate non-linearities in the trend and shrunk back to no trend when there were  
313 only data for 1-3 regions (Fig 4D, Fig 5). The slow prior also tended to have the poorest

314 coverage of the true magnitude when there were only 1-6 regions included. The slow prior  
315 was also more confident about the magnitude of the trend (narrower credible intervals, Fig  
316 5). Results were similar when estimating declines over 1970 - 2017 (Fig S4). It is notable  
317 that INLA's default prior gave similar results to the prior informed by life-history traits (Fig  
318 5).

319 With a greater number of regions the estimate of decline converged to 64%. Subsets with  
320 southern regions tended to overestimate the decline, whereas subsets with middle and  
321 northern regions tended to underestimate the decline (Fig. 5). Data subsets that mixed  
322 extreme north and south regions were closer to the 64% decline than data subsets just of  
323 north or south regions. There was a notable spike in abundance during the 1970s predicted  
324 by the model that used all regions and the life-history prior (Fig 4A), which was not present  
325 in subsets of the data (Fig 4B-D).

326 A generalized additive mixed model fitted using maximum likelihood methods showed a  
327 similar pattern to the Bayesian model of convergence of trend estimates as more regions  
328 were added, and greater declines estimated if data were taken from southern regions when  
329 compared to data taken from northern regions (Fig S5). The GAMM had similar results for  
330 either standard setting for its degrees of freedom.

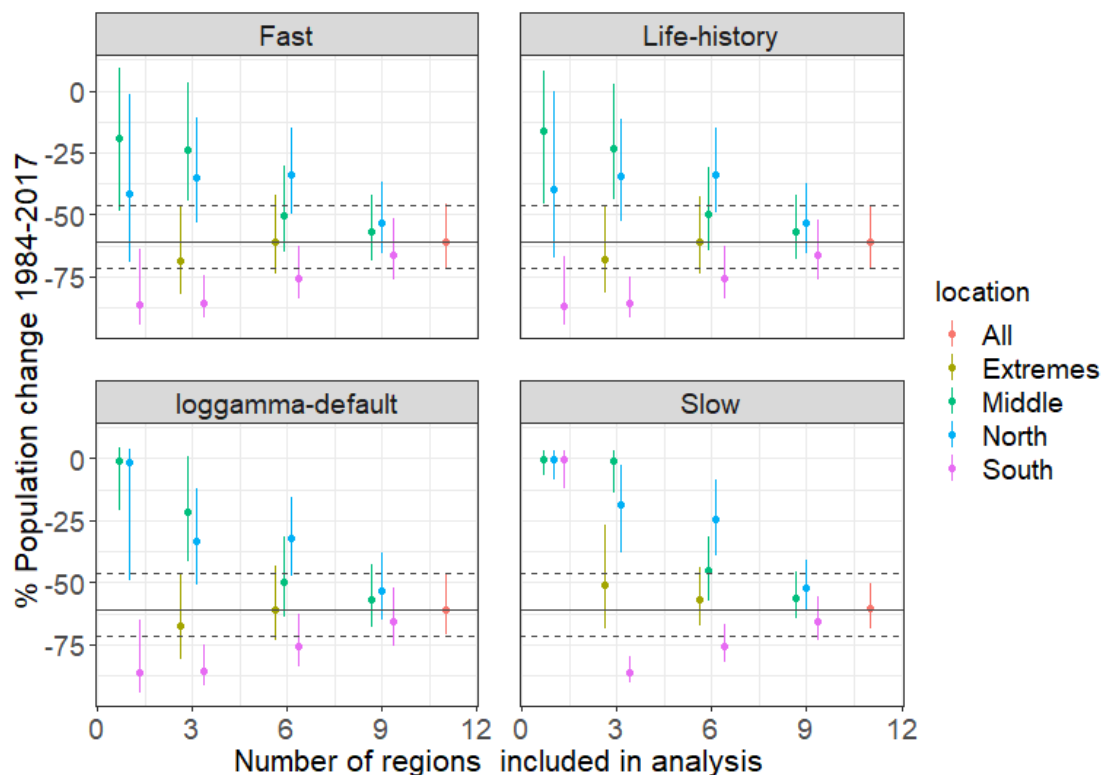

331

332 **Fig 5** Estimated magnitudes of decline for the each prior (panels) and each scenario for  
333 subsets of regions (coloured points) over 3 generations (1984-2017). Points give median  
334 estimates and bars give 95% C.I.s. For comparison, the black and dashed lines give the  
335 median and 95% C.I.s for the life-history prior fitted to data for all regions.

## 336 Discussion

337 Important statistics for informing on the status of threatened species and the effectiveness  
338 of management interventions are estimates of the magnitude of population change  
339 (Rodrigues et al. 2006). We found the accuracy of population change estimates can be  
340 improved by fitting non-linear trends where the level of smoothing is informed with life-  
341 history traits and that greater spatial replication of time-series can improve the reliability  
342 of estimates. Accurate estimates of population change for wide-ranging species are

343 therefore best based on sampling that covers a large part of their range. However, spatially  
344 extensive sampling can be expensive and not all species will have spatially extensive time-  
345 series available for assessing trends (Kindsvater et al. 2018). We additionally found that  
346 using prior information on life-history traits can help to establish more robust estimates of  
347 decline by smoothing over short-term and local deviations in population size.

348 We introduced a method for using Bayesian priors to inform on the degree of non-linearity  
349 in population trends. The method may help to overcome some of biases that come from  
350 analysing abundance indices with purely descriptive statistical models (Maunder et al.  
351 2006). For instance, models that limit population growth by life-history parameters can  
352 overcome biased trends that resulted from change in detection probability of cryptic  
353 species (Sköld & Knape 2018). The results for the three generation decline were similar for  
354 all priors, so long as all sites were included in the analysis. The generalized additive model  
355 also estimated a similar rate of decline as the Bayesian model. The convergence in  
356 estimates across these different methods occurred because the tiger sharks CPUE data had  
357 a strong trend. Where patterns in the data are strong, the prior will be less influential (e.g.  
358 Kindsvater et al. 2018).

359 Despite the consistencies in trend estimates across the different methods, we still advocate  
360 using prior information to inform on population variability. The informed prior gave  
361 estimates closer to the global trend when subsets of the data were used. It is also powerful  
362 that we can tune the level of smoothing in the Bayesian model for a species life-history.  
363 Life-history does not figure into the choice of smoothing for generalized additive models,  
364 which instead be made by evaluating smoothing against the data at hand, or with reference

365 to simulation studies that are often from very different organisms (Fewster et al. 2000;  
366 Knape 2016). In our simulations the predictive ordinate (an in-sample evaluation measure)  
367 performed poorly in that it did not distinguish among different priors. This suggests that  
368 using the in-sample measures may lead to overfitting of the smoothing splines. We suggest  
369 that a-priori decisions about smoothing will provide more accurate trend estimates.  
370 Informed priors may also be more easily justified than choices about smoothing made with  
371 reference to other organisms. Defensible parameter choices are important when model  
372 results may be contested, such as when governments make potentially contentious  
373 decisions about the status of populations (e.g. Edgar et al. 2018).

374 When life-history traits are uncertain we suggest using a penalized complexity prior that  
375 allows for greater variation (and non-linearity) in the long-term trend. Our simulations  
376 study suggested that priors that allow for higher variance gave more accurate results than  
377 priors that restricted variance. However, the decision to allow for overestimation of  
378 variance may not be safe if a different prior distribution other than the penalized  
379 complexity priors was used. For instance, very flat priors that give equal prior weighting to  
380 low and high temporal variances can perform very poorly (Simpson et al. 2017). The shape  
381 of the penalized complexity prior was specifically designed to allow the data to speak for  
382 themselves when trends are strong, but to shrink estimates towards no trend when the  
383 data are weak or noisy (Simpson et al. 2017). Our results add further support to usefulness  
384 of penalized complexity priors for applied problems.

385 An avenue that requires further research is testing the utility of the new method across  
386 many species with a broader range of life-history types. We expect the approach will work

387 best when short-term variation in abundance, such as that caused by temporary  
388 migrations, is much more variable than long-term trends. For very fast growing species,  
389 such as those with maturity ages of <1 year, a statistical model fitted to annual data may  
390 confound real population trends with short-term deviations. Classification errors for IUCN  
391 red list status tend to be greater for species with fast population growth than species with  
392 slow population growth (Rueda-Cediel et al. 2018). For instance, the results of our  
393 simulation study were most accurate for slow growing species, whereas accuracy was more  
394 variable for fast growing species. The random walk model could still be effective if the  
395 temporal resolution of sampling was increased (e.g. with sub-annual data).

396 A further improvement to the model would be to specify a prior that allows for greater  
397 population declines than population increases. Rapid declines in population abundance  
398 tend to be more common than rapid increases (Anderson et al. 2017), because the  
399 processes that cause declines, like overfishing, often operate on a much faster time-scale  
400 than reproduction and population recovery. An alternative would be to use a more complex  
401 model, like the Gompertz, that allows for a hard upper limit on population increases (Sköld  
402 & Knape 2018). Our simulation study of rapid declines suggested that the random walk  
403 with penalized complexity prior can still detect rapid declines in abundance, because its  
404 long probability tail does allow for rare but rapid changes in abundance. Conservation  
405 management must balance the risk of missing a true decline against the chance of false  
406 alarm. A next step therefore, would be to apply Bayesian decision analysis to optimise  
407 models for the balance between the cost of missed detection and the cost of false alarms.

408 The decline of tiger sharks we observed is consistent with a decline in large sharks  
409 throughout the world's oceans (e.g. Baum & Myers 2004; Ferretti et al. 2008; Roff et al.  
410 2018). The current global population trend for tiger sharks is unknown, although there is  
411 considerable variation across different oceans, with some regions showing no change  
412 (Baum & Myers 2004) and others large declines (Baum et al. 2003). Overall, their relatively  
413 high growth and reproductive rates (Cortés 2002; Holmes et al. 2015) means that tiger  
414 sharks are not considered at high risk of extinction (Simpfendorfer 2009). The  
415 conservation status of tiger sharks globally escalated from "Lower Risk/near threatened"  
416 under the IUCN listing to "Near Threatened" in 2005 (Simpfendorfer 2009).

417 Tiger sharks may warrant listing as Endangered under state and national threatened  
418 species legislation (IUCN Criteria A2, >50% decline over three generations). The trend we  
419 observed in Queensland may be part of a broader scale trend. Genetic studies indicate the  
420 east coast population is part of a well mixed Indo-Pacific population (Holmes et al. 2017).  
421 Further, in nearby New South Wales tiger shark catches have also declined, a decline that  
422 has been attributed to increased fishing pressure in temperate waters (Reid et al. 2011).  
423 While our study does not cover the entire Indo-Pacific population, the large spatial extent  
424 of the current study (11 regions across 1760km of coastline) plus declines in adjacent NSW  
425 nearly 1000km south (Reid et al. 2011) likely reflects a large scale regional trend spanning  
426 18° in latitude across tropical and temperate coastlines of eastern Australia. While the  
427 inclusion of time-series data from throughout Indo-Pacific would strengthen evidence for a  
428 whole of population decline, long-term datasets spanning multiple generations are largely  
429 absent for adjacent regions in the Pacific.



430 While some uncertainty exists in the historical data used here, data collection was  
431 standardized in the QSCP in the early 1990's. This implies trends in recent decades when  
432 declines have been observed are robust (see Roff et al. (2018) for discussion). Our  
433 proposed statistical method may also help smooth over temporal and regional variability in  
434 trends by estimating the long-term trend that is consistent across regions, and by  
435 controlling for differences in gear type.

436 We considered how estimates of population trends for wide-ranging species depend both  
437 on the spatial extent of data and the model used to partition short-term variation from  
438 long-term trends in population size. We found that the choice of model and the spatial  
439 extent of sampling interact to effect population trends. Informing priors with life-history  
440 information could improve the accuracy of estimates, particularly when sampling was  
441 constrained to fewer regions across a species range. Informed priors provide theoretical  
442 grounds for choosing the level of smoothing when modelling population trends. The trends  
443 estimated here, while dependent on the quality of the CPUE data, suggest that tiger sharks  
444 should be listed as a threatened species under Australian state and possibly national  
445 legislation.

## 446 **Authors contributions**

447 CB and JR conceived of the manuscript idea and designed the study. JR obtained the data,  
448 performed quality control and conducted initial analyses. CB conducted the modelling. CB  
449 and JR created the figures and wrote the manuscript.

## 450 Acknowledgements

451 Use of the Shark Control Program data is by courtesy of the State of Queensland, Australia  
452 through the Department of Agriculture and Fisheries. We thank Juan Oliphant for the tiger  
453 shark photographs and Sebastian Pardo for comments. CJB was supported by a Discovery  
454 Early Career Researcher Award (DE160101207) from the Australian Research Council. CJB  
455 wishes to thank TB for his patience through numerous drafts.

## 456 Literature cited

- 457 Anderson SC, Branch TA, Cooper AB, Dulvy NK. 2017. Black-swan events in animal  
458 populations. *Proceedings of the National Academy of Sciences* **114**:3252–3257. National  
459 Acad Sciences.
- 460 Baum JK, Blanchard W. 2010. Inferring shark population trends from generalized linear  
461 mixed models of pelagic longline catch and effort data. *Fisheries Research* **102**:229–239.  
462 Elsevier.
- 463 Baum JK, Myers RA. 2004. Shifting baselines and the decline of pelagic sharks in the Gulf of  
464 Mexico. *Ecology Letters* **7**:135–145. Wiley Online Library.
- 465 Baum JK, Myers RA, Kehler DG, Worm B, Harley SJ, Doherty PA. 2003. Collapse and  
466 conservation of shark populations in the Northwest Atlantic. *Science* **299**:389–392.  
467 American Association for the Advancement of Science.
- 468 Camhi MD, Valenti S, Fordham S, Fowler S, Gibson C. 2009. The conservation status of  
469 pelagic sharks and rays: Report of the IUCN shark specialist group pelagic shark red list

470 workshop. IUCN Species Survival Commission Shark Specialist Group. Newbury, UK. x+

471 78p.

472 Committee TSS. (n.d.). Guidelines for assessing the conservation status of native species

473 according to the environment protection and biodiversity conservation act 1999 and

474 environment protection and biodiversity conservation regulations 2000.

475 [http://www.environment.gov.au/biodiversity/threatened/nominations/forms-and-](http://www.environment.gov.au/biodiversity/threatened/nominations/forms-and-guidelines)

476 [guidelines](http://www.environment.gov.au/biodiversity/threatened/nominations/forms-and-guidelines); Australian Government, Department of Environment; Energy.

477 Conservation of Nature Species Survival Commission IU for. 2001. IUCN Red List categories

478 and criteria. Version 3.1. [https://www.iucn.org/content/iucn-red-list-categories-and-](https://www.iucn.org/content/iucn-red-list-categories-and-criteria-version-31)

479 [criteria-version-31](https://www.iucn.org/content/iucn-red-list-categories-and-criteria-version-31); IUCN, Gland, Switzerland.

480 Cortés E. 2002. Incorporating uncertainty into demographic modeling: Application to shark

481 populations and their conservation. *Conservation Biology* **16**:1048–1062. Wiley Online

482 Library.

483 Cortés E. 2016. Perspectives on the intrinsic rate of population growth. *Methods in Ecology*

484 *and Evolution* **7**:1136–1145. Wiley Online Library.

485 Dudley SF, Simpfendorfer CA. 2006. Population status of 14 shark species caught in the

486 protective gillnets off KwaZulu–Natal beaches, South Africa, 1978–2003. *Marine and*

487 *Freshwater Research* **57**:225–240. CSIRO.

488 Edgar GJ, Ward TJ, Stuart-Smith RD. 2018. Rapid declines across Australian fishery stocks

489 indicate global sustainability targets will not be achieved without an expanded network of

- 490 “no-fishing” reserves. *Aquatic Conservation: Marine and Freshwater Ecosystems* **28**:1337–  
491 1350. Wiley Online Library.
- 492 Environment QGD of, Heritage Protection. (n.d.). Threatened species.  
493 <https://www.ehp.qld.gov.au/wildlife/threatened-species/>.
- 494 Ferretti F, Myers RA, Serena F, Lotze HK. 2008. Loss of large predatory sharks from the  
495 Mediterranean Sea. *Conservation Biology* **22**:952–964. Wiley Online Library.
- 496 Fewster RM, Buckland ST, Siriwardena GM, Baillie SR, Wilson JD. 2000. Analysis of  
497 population trends for farmland birds using generalized additive models. *Ecology* **81**:1970–  
498 1984. Wiley Online Library.
- 499 Forney KA. 2000. Environmental models of cetacean abundance: Reducing uncertainty in  
500 population trends. *Conservation Biology* **14**:1271–1286. Wiley Online Library.
- 501 Gaston KJ, McArdle BH. 1994. The temporal variability of animal abundances: Measures,  
502 methods and patterns. *Phil. Trans. R. Soc. Lond. B* **345**:335–358. The Royal Society.
- 503 Held L, Schrödle B, Rue H. 2010. Posterior and cross-validated predictive checks: A  
504 comparison of MCMC and INLA. Pages 91–110 in *Statistical modelling and regression*  
505 *structures*. Springer.
- 506 Holmes BJ, Peddemors VM, Gutteridge AN, Geraghty PT, Chan RW, Tibbetts IR, Bennett MB.  
507 2015. Age and growth of the tiger shark *Galeocerdo cuvier* off the east coast of Australia.  
508 *Journal of Fish Biology* **87**:422–448. Wiley Online Library.

- 509 Holmes BJ, Sumpton WD, Mayer DG, Tibbetts IR, Neil DT, Bennett MB. 2012. Declining  
510 trends in annual catch rates of the tiger shark (*Galeocerdo cuvier*) in Queensland, Australia.  
511 Fisheries Research **129**:38–45. Elsevier.
- 512 Holmes BJ, Williams SM, Otway NM, Nielsen EE, Maher SL, Bennett MB, Ovenden JR. 2017.  
513 Population structure and connectivity of tiger sharks (*Galeocerdo cuvier*) across the Indo-  
514 Pacific Ocean basin. Royal Society Open Science **4**:170309. The Royal Society.
- 515 Keith D et al. 2015. Temporal correlations in population trends: Conservation implications  
516 from time-series analysis of diverse animal taxa. Biological Conservation **192**:247–257.  
517 Elsevier.
- 518 Kidston W, Dwyer K, Buhk A, Waldock J, Anderson G. 1992. Review of the operation and  
519 maintenance of shark meshing equipment in Queensland waters: Report of the Committee  
520 of Inquiry. Queensland Department of Primary Industries: Brisbane.
- 521 Kindsvater HK, Dulvy NK, Horswill C, Juan-Jordá M-J, Mangel M, Matthiopoulos J. 2018.  
522 Overcoming the data crisis in biodiversity conservation. Trends in Ecology & Evolution.  
523 Elsevier.
- 524 Knape J. 2016. Decomposing trends in Swedish bird populations using generalized additive  
525 mixed models. Journal of Applied Ecology **53**:1852–1861. Wiley Online Library.
- 526 Martins TG, Simpson D, Lindgren F, Rue H. 2013. Bayesian computing with INLA: New  
527 features. Computational Statistics & Data Analysis **67**:68–83. Elsevier.

- 528 Maunder MN, Sibert JR, Fonteneau A, Hampton J, Kleiber P, Harley SJ. 2006. Interpreting  
529 catch per unit effort data to assess the status of individual stocks and communities. *ICES*  
530 *Journal of Marine Science* **63**:1373–1385. Oxford University Press.
- 531 Pardo SA, Kindsvater HK, Reynolds JD, Dulvy NK. 2016. Maximum intrinsic rate of  
532 population increase in sharks, rays, and chimaeras: The importance of survival to maturity.  
533 *Canadian journal of fisheries and aquatic sciences* **73**:1159–1163. NRC Research Press.
- 534 Payne NL et al. 2018. Combining abundance and performance data reveals how  
535 temperature regulates coastal occurrences and activity of a roaming apex predator. *Global*  
536 *Change Biology* **24**:1884–1893. Wiley Online Library.
- 537 R Core Team. 2018. R: A language and environment for statistical computing. Vienna,  
538 Austria.
- 539 Reid D, Robbins W, Peddemors V. 2011. Decadal trends in shark catches and effort from the  
540 New South Wales, Australia, shark meshing program 1950–2010. *Marine and Freshwater*  
541 *Research* **62**:676–693. CSIRO.
- 542 Rodrigues AS, Pilgrim JD, Lamoreux JF, Hoffmann M, Brooks TM. 2006. The value of the  
543 IUCN Red List for conservation. *Trends in Ecology & Evolution* **21**:71–76. Elsevier.
- 544 Roff G, Brown C, Priest M, Mumby P. 2018. Rapid decline of coastal apex shark populations  
545 over the past half century. in review **0**:0–0.
- 546 Rue H, Held L. 2005. Gaussian Markov random fields: Theory and applications. CRC press.

- 547 Rue H, Martino S, Chopin N. 2009. Approximate Bayesian inference for latent Gaussian  
548 models by using integrated nested Laplace approximations. *Journal of the Royal Statistical*  
549 *Society: Series B (Statistical Methodology)* **71**:319–392. Wiley Online Library.
- 550 Rue H, Riebler A, Sørbye SH, Illian JB, Simpson DP, Lindgren FK. 2017. Bayesian computing  
551 with INLA: A review. *Annual Review of Statistics and Its Application* **4**:395–421. *Annual*  
552 *Reviews*.
- 553 Rueda-Cediel P, Anderson KE, Regan TJ, Regan HM. 2018. Effects of uncertainty and  
554 variability on population declines and IUCN Red List classifications. *Conservation Biology*.  
555 Wiley Online Library.
- 556 Simpfendorfer C. 2009. *Galeocerdo cuvier*. The IUCN Red List of Threatened Species 2009.
- 557 Simpson D, Rue H, Riebler A, Martins TG, Sørbye SH, others. 2017. Penalising model  
558 component complexity: A principled, practical approach to constructing priors. *Statistical*  
559 *Science* **32**:1–28. Institute of Mathematical Statistics.
- 560 Sköld M, Knappe J. 2018. Bounding reproductive rates in state-space models for animal  
561 population dynamics. *Ecosphere* **9**:e02215. Wiley Online Library.
- 562 Sumpton W, Lane B, Ham A, others. 2010. Gear modifications and alternative baits that  
563 reduce bait scavenging and minimize by-catch on baited drum-lines used in the queensland  
564 shark control program. *Proceedings of the Royal Society of Queensland, The* **116**:23. Royal  
565 Society of Queensland.
- 566 Szuwalski CS, Thorson JT. 2017. Global fishery dynamics are poorly predicted by classical  
567 models. *Fish and Fisheries* **18**:1085–1095. Wiley Online Library.

- 568 Ward-Paige C, Keith D, Worm B, Lotze HK. 2012. Recovery potential and conservation  
569 options for elasmobranchs. *Journal of Fish Biology* **80**:1844–1869. Wiley Online Library.
- 570 Wilson HB, Kendall BE, Possingham HP. 2011. Variability in population abundance and the  
571 classification of extinction risk. *Conservation Biology* **25**:747–757. Wiley Online Library.
- 572 Wood SN. 2006. *Generalized additive models: An introduction with r*. Chapman; Hall/CRC.
- 573 Wood SN. 2017. *Generalized additive models: An introduction with R*. Chapman; Hall/CRC.
